# Supplementary material
Source: PubMed Central journal article supplement (PMC3771361)
Supplement: NIHMS497819-supplement-Supporting_Information.pdf [file NIHMS497819-supplement-Supporting_Information.pdf]

Supporting information for:

**Table of contents:**

|                                                                                                         |   |
|---------------------------------------------------------------------------------------------------------|---|
| S1. Optical image of the hydrogel formed by <b>1</b>                                                    |   |
| 2                                                                                                       |   |
| S2. Characteristics of <b>1</b> at the concentration below the threshold concentration of self-assembly | 3 |
| S2.1 TEM image of <b>1</b> at 300 $\mu$ M                                                               | 3 |
| S2.2 Fluorescent spectra of <b>1</b> at different concentration                                         | 3 |
| S3. Long term cytotoxicity of <b>1</b> on PC12 cells                                                    | 4 |
| S4. Time dependent cytotoxicity of <b>1</b> on HeLa cells                                               | 5 |
| S5. Apoptosis assays on T98G cells                                                                      | 6 |
| S6. Comparison of the intracellular concentrations of <b>1</b> in PC12 and T98G cells                   | 7 |
| S7. Characteristics and cytotoxicity of a structure analog of <b>1</b>                                  | 8 |
| S8. Quantification of the concentration of <b>1</b> after filtration                                    | 9 |

**S1. Optical image of the hydrogel formed by **1****

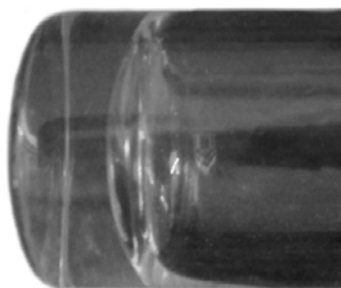

***Figure S1.*** The hydrogel formed by 0.4 wt% of **1** in PBS buffer.

Hydrogelation of **1** demonstrates the ability of self-assembly of **1**.

## S2. Characteristics of **1** at the concentration below the threshold concentration of self-assembly

### S2.1 TEM image of **1** at 300 $\mu\text{M}$

*Negative staining of TEM:* Carbon coated grids were glow discharged just before using to increase their hydrophilicity. The sample solution (3  $\mu\text{L}$ ) was placed on the grid to cover the grid surface. After rinsing the grids for 10 s, a large drop of the ddH<sub>2</sub>O was placed on parafilm and let the grid touch the water drop, with the sample-loaded surface facing the parafilm. The grid was tilted, and water was gently absorbed from the edge of the grid by using a filter paper for 3 times. The grid was stained immediately by letting the grid touch a drop of 2.0 % (w/v) uranyl acetate on the parafilm with the sample-loaded surface. The grid was tilted, and the stain solution was gently absorbed from the edge of the grid by using a filter paper for 3 times. The grid was allowed to dry in air for a few minutes and was examined immediately.

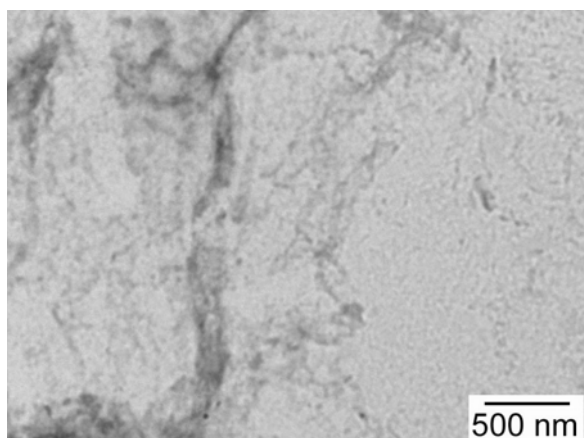

**Figure S2.** Negative-stained TEM images of the solution of **1** at 300  $\mu\text{M}$  in PBS buffer.

### S2.2 Fluorescent spectra of **1** at different concentration

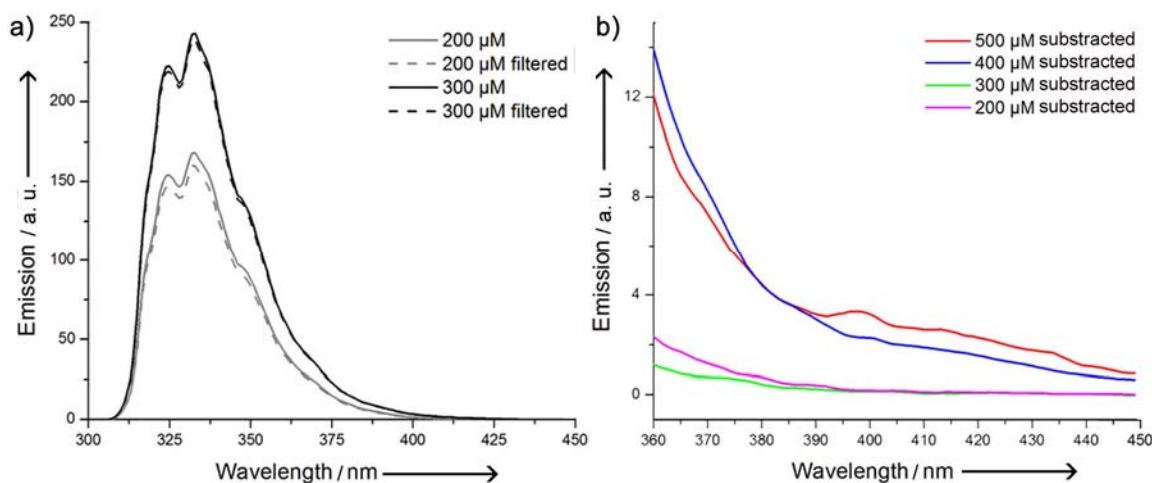

**Figure S3.** Fluorescence spectra of **1** in PBS buffer with increased concentration of **1** ( $\lambda_{\text{ex}} = 275 \text{ nm}$ ). a) Fluorescence spectra of **1** at 200 and 300  $\mu\text{M}$  in PBS buffer with and without filtration. b) The excimer band of naphthalene group was obtained by subtraction of the fluorescence spectra of filtrated **1** from the spectra of as prepared **1** solution ( $\lambda_{\text{ex}} = 275 \text{ nm}$ ). Filtration of **1** induces little change in the emission intensity of **1** at 200 and 300  $\mu\text{M}$  and there is little intensity for excimer of naphthalene at 200 and 300  $\mu\text{M}$ .

### S3. Long term cytotoxicity of **1** on PC12 cells

*MTT cell viability test:* Seed cells in a 96 well plate at a concentration of 50,000 cell/well. Allow attachment for 24 h at 37°C, 5% CO<sub>2</sub>, remove culture medium and place 100 µL new culture medium containing **1** into each well. After culturing at 37 °C, 5 % CO<sub>2</sub> for desired time, add 10 µL of 5 mg/mL MTT ((3-(4,5-Dimethylthiazol-2-yl)-2,5-diphenyltetrazolium bromide) to each well and incubate the plated at dark for 4 h. Add 100 µL 10 % SDS with 0.01 M HCl to each well to stop the reduction reaction and dissolve the purple. After incubation at 37 °C for overnight, determine the viability by DTX 880 multimode detector.

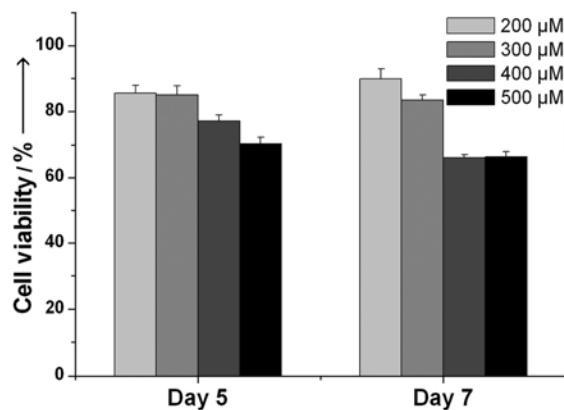

**Figure S4.** MTT cell viability tests of long-term cytotoxicity of **1** on PC12 cells.

#### S4. Time dependent cytotoxicity of **1** on HeLa cells

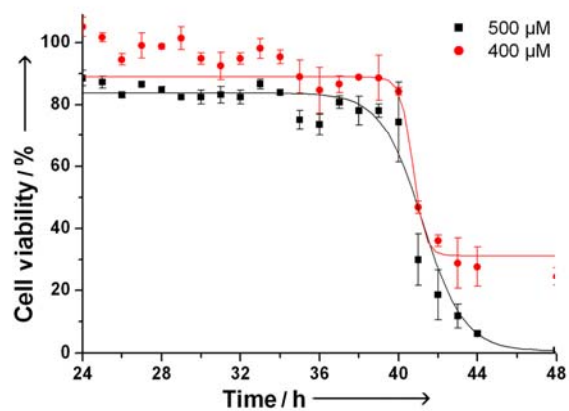

*Figure S5.* Time dependent cytotoxicity of the nanofibers of **1** towards HeLa cells.

## S5. Apoptosis assays on T98G cells

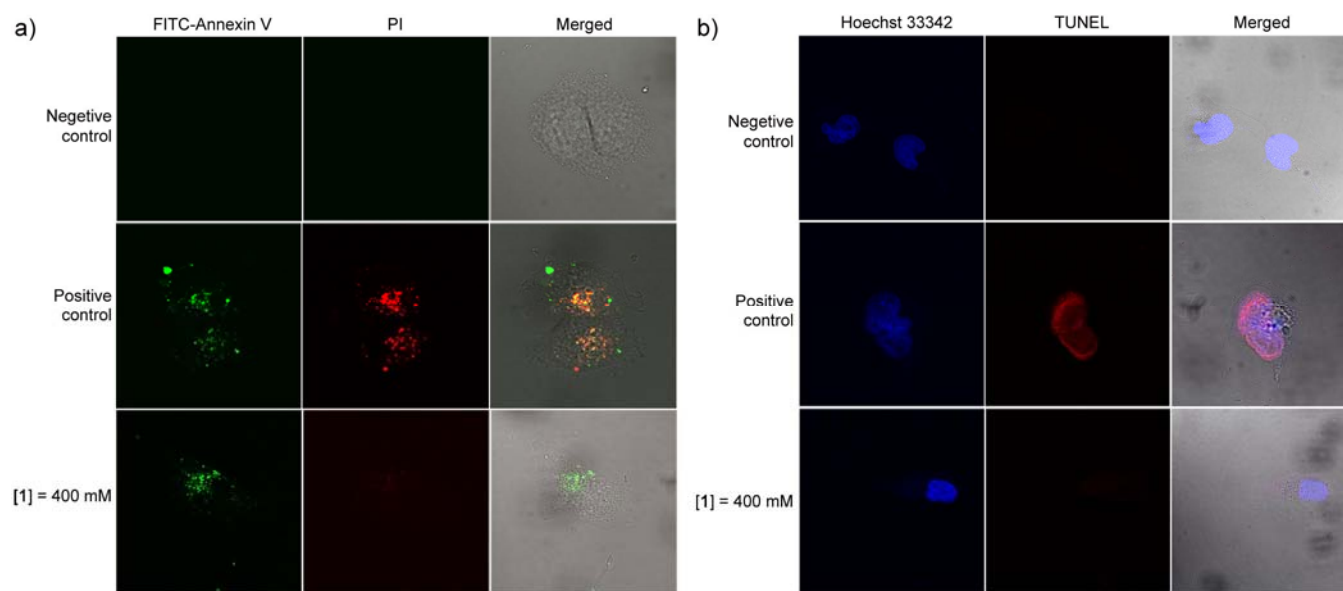

**Figure S6.** Apoptosis assays on T98G cells. a) FITC-annexin V and PI assays of T98G cells. Negative control is untreated T98G cells. Positive control induced by incubation of T98G cells with 10% DMSO for 24 h. T98G cells treated by 400  $\mu$ M of **1** for 24 h shows positive FITC-annexin V stain but negative PI stain. b) TUNEL assays of T98G cells. Negative control is untreated T98G cells. Positive control induced by incubation of T98G cells with DNAase I for 30 min. Scale bar = 10  $\mu$ m.

## S6. Comparison of the intracellular concentrations of **1** in PC12 and T98G cells

*Intracellular concentration of 1:* Cells in exponential growth phase were seeded in 10 cm petri dish at 10,000 cell/mL. The cells were allowed for attachment for 24 h at 37 °C, 5% CO<sub>2</sub>. The culture medium was removed, and new culture medium containing **1** at 0 or 400 μM was added. After 12 h of incubation, cells were washed with PBS buffer for 3 times and collected by cell scraper with 1 mL of PBS buffer. Centrifuge the cell suspension at 600 g for 5 min to get cell pellet. Take 10 μL of cell pellet and lyse the cells in 200 μL of water and 200 μL of MeOH. Centrifuge at 12,000 g for 5 min to remove insoluble proteins and collect the lysate suspension. The concentration of **1** in the lysate was measured by LC-MS.

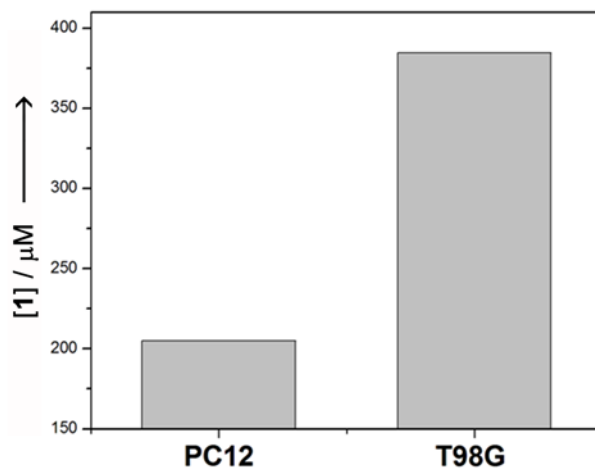

**Figure S7.** Intracellular concentration of **1** in PC12 and T98G cells after incubation with 400 μM of **1** for 12 h.

## S7. Characteristics and cytotoxicity of a structure analog of 1

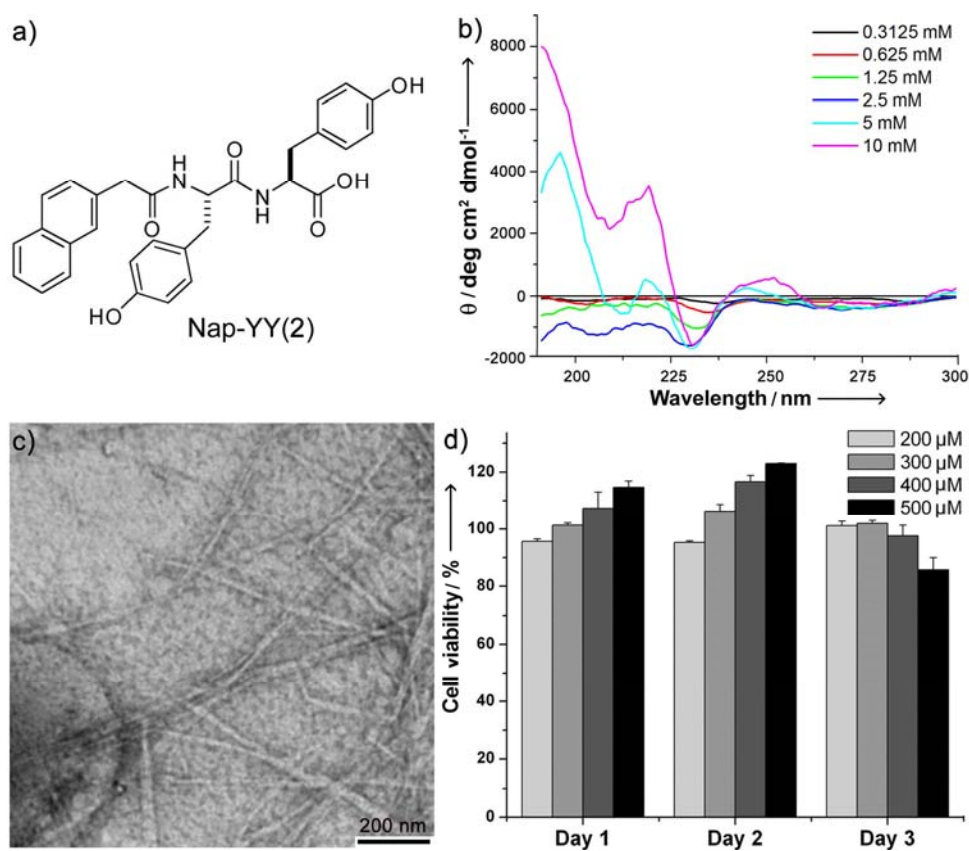

**Figure S8.** Replacement of phenylalanine in **1** to tyrosine gives rise to Nap-YY (**2**) that has poorer gelation ability and lower cytotoxicity than **1**. a) Chemical structure of **2**. b) Circular dichroism spectra of **2** at different concentrations in PBS buffer. c) TEM image of **2** at 5 mM shows the self-assembled structures of **2**. d) MTT assay of HeLa cells incubated with **2**.



## S8. Quantification of concentration of **1** after filtration

*Table S1.* Concentrations of **1** after filtration.

| Initial concentration ( $\mu\text{M}$ ) | Concentration after filtration( $\mu\text{M}$ ) <sup>a</sup> |
|-----------------------------------------|--------------------------------------------------------------|
| 200                                     | 190                                                          |
| 300                                     | 251                                                          |
| 400                                     | 336                                                          |
| 500                                     | 329                                                          |

<sup>a</sup> Following filtration, the solutions of **1** were diluted three folds by MeOH to ensure complete dissolution of **1**. The concentration of **1** was calculated from the absorbance of the solution at 260 nm.
